# Supplementary material for: Direct imaging of electric field behavior in 2,7-diphenyl[1]benzothieno[3,2-b][1]benzothiophene organic field-effect transistors by sum-frequency generation imaging microscopy
Source: Royal Society of Chemistry journal article supplement (doi:10.1039/d0cp06407f), 2021-01-01
Supplement: d0cp06407f1.pdf [file d0cp06407f1.pdf]

***Electronic Supplementary Information for :***

Direct imaging of Electric field behavior in 2,7-Diphenyl[1]benzothieno[3,2-b][1]benzothiophene Organic Field-Effect transistors by Sum-Frequency Generation Imaging Microscopy

Chiho Katagiri,<sup>a</sup> Takayuki Miyamae,<sup>\*,b,c</sup> Hao Li<sup>d</sup>, Fangyuan Yang<sup>d</sup> and Steven Baldelli<sup>\*,d</sup>

<sup>a</sup> *Nanomaterials Research Institute, National Institute of Advanced Industrial Science and Technology (AIST), 1-1-1 Higashi, Tsukuba, Ibaraki 305-8565, Japan.*

<sup>b</sup> *Graduate School of Engineering, Chiba University, 1-33 Yayoi-cho, Inage-ku, Chiba 263-8522, Japan.*

<sup>c</sup> *Molecular Chirality Research Center, Chiba University, 1-33 Yayoi-cho, Inage-ku, Chiba, 263-8522, Japan.*

<sup>d</sup> *Department of Chemistry, University of Houston, Houston, Texas 77204-5003, United States.*

E-mail\* T. Miyamae: [t-miyamae@chiba-u.jp](mailto:t-miyamae@chiba-u.jp), S. Baldelli: [sbaldelli@uh.edu](mailto:sbaldelli@uh.edu)

## Supplementary Tables and Figures

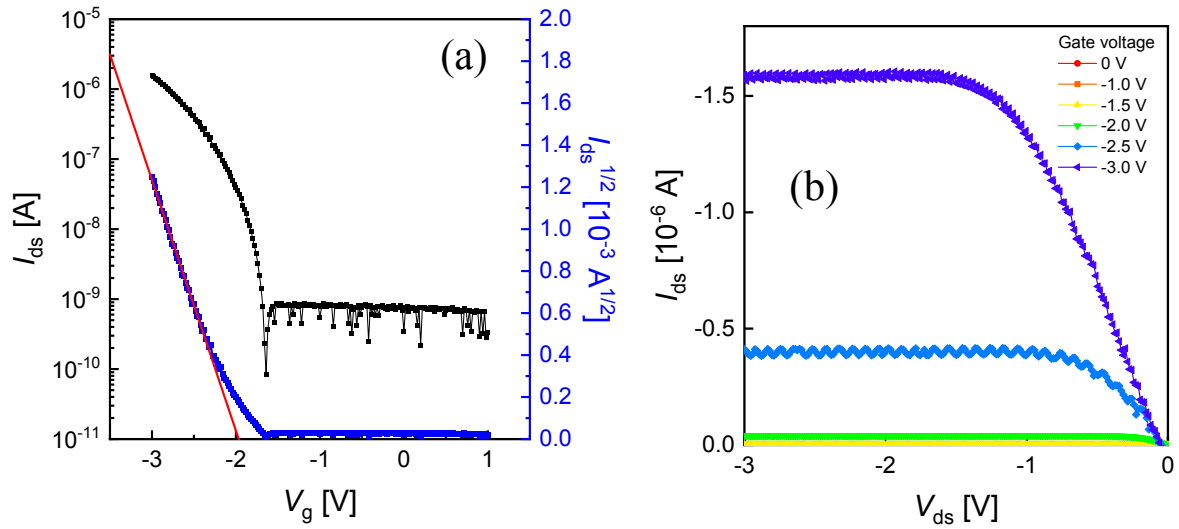

Figure S1. (a) Transfer characteristics and (b) output characteristics of the OFET device with a channel length of 50  $\mu\text{m}$ . The hole mobility was estimated to be 0.22  $\text{cm}^2/\text{Vs}$ .

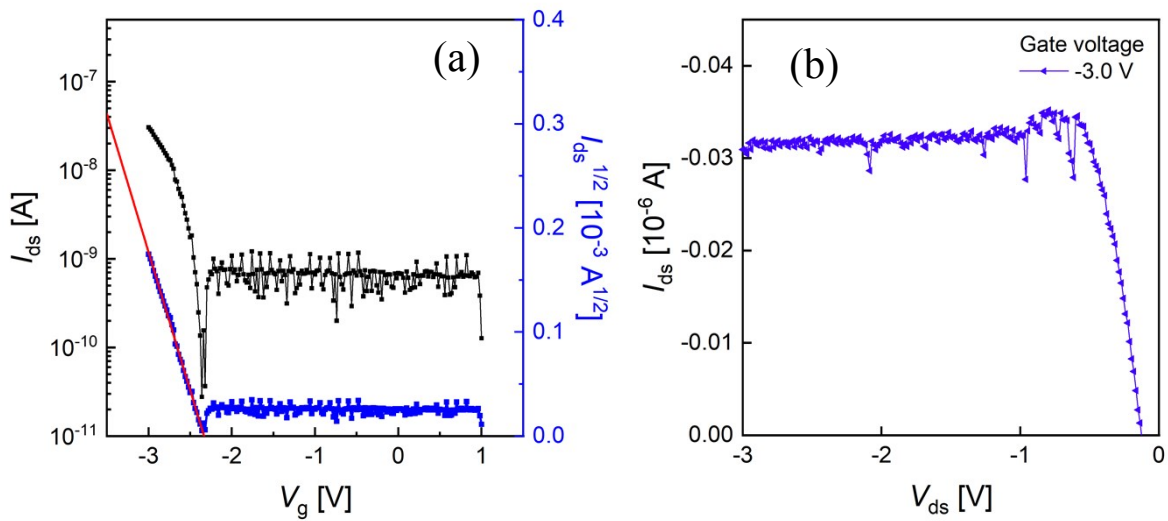

Figure S2. (a) Transfer characteristics and (b) output characteristic for a gate voltage of -3 V of the OFET device with a channel length of 300  $\mu\text{m}$ . The hole mobility was estimated to be 0.065  $\text{cm}^2/\text{Vs}$ .

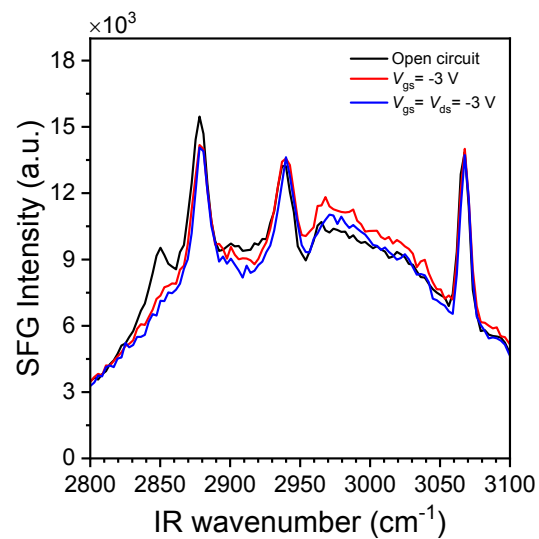

Figure S3. PPP-polarized SFG spectra of the OFET device under different voltage conditions.

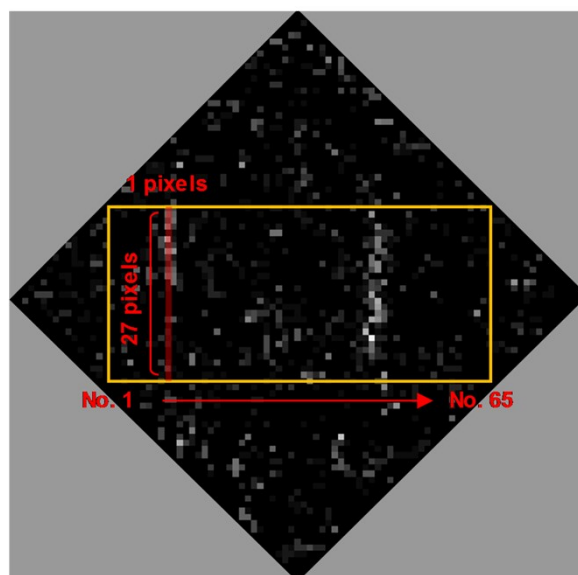

Figure S4. The reconstructed SFG image for the application of  $V_{gs} = V_{ds} = -3$  V. The numbers between 1 to 65 show the position of a rectangular area with  $1 \times 27$  pixel.

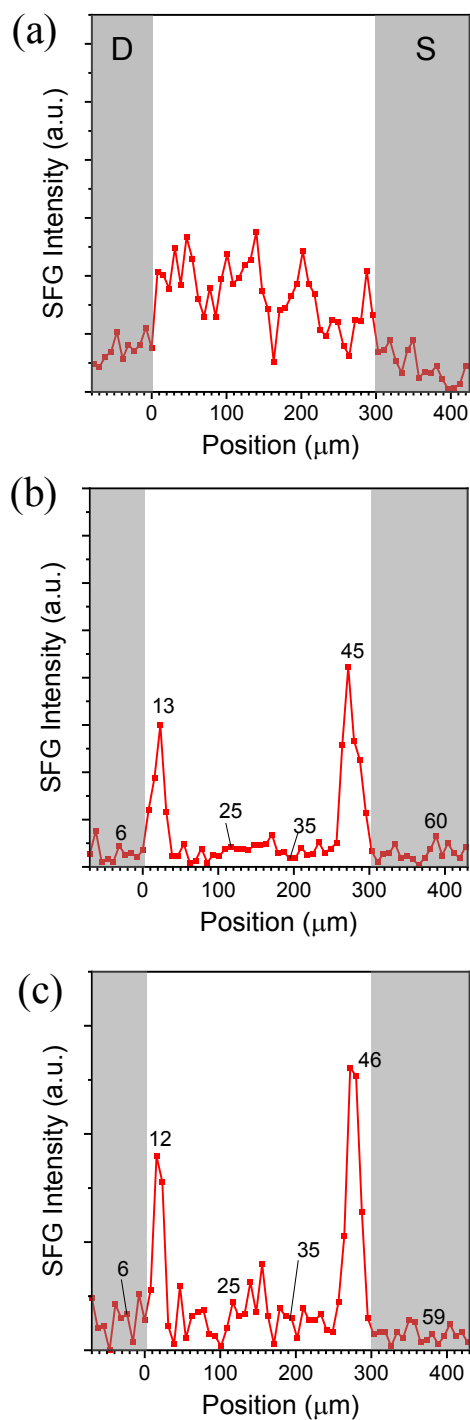

Figure S5. The intensity distribution of SFG signal of methyl CH stretching across the semiconductor channel region for (a) the open circuit condition (before turn-on voltage), (b)  $V_{\text{gs}} = -3 \text{ V}$  and (c)  $V_{\text{gs}} = V_{\text{ds}} = -3 \text{ V}$ .

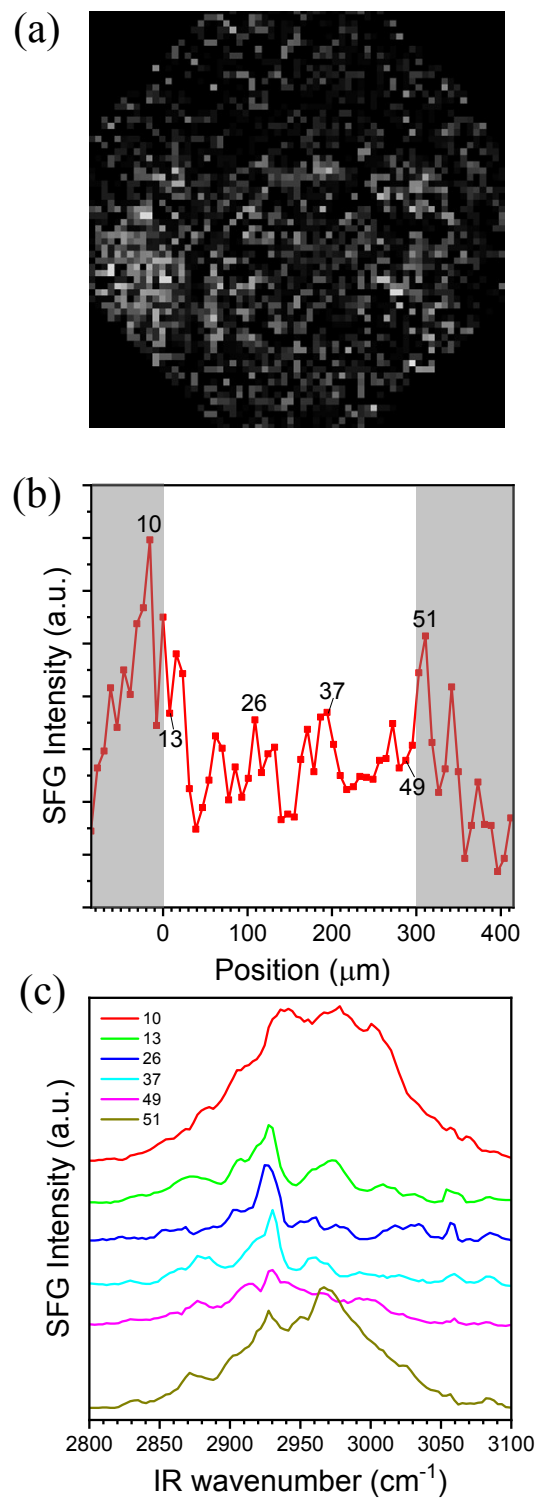

Figure S6. (a) PPP polarized SFG image at  $2920\text{ cm}^{-1}$ , (b) the distribution of SFG intensity along the channel L, and (c) SFG spectra under the application of  $V_{\text{gs}} = -3\text{ V}$  for No. 10, 13, 26, 37, 49, and 51 positions.

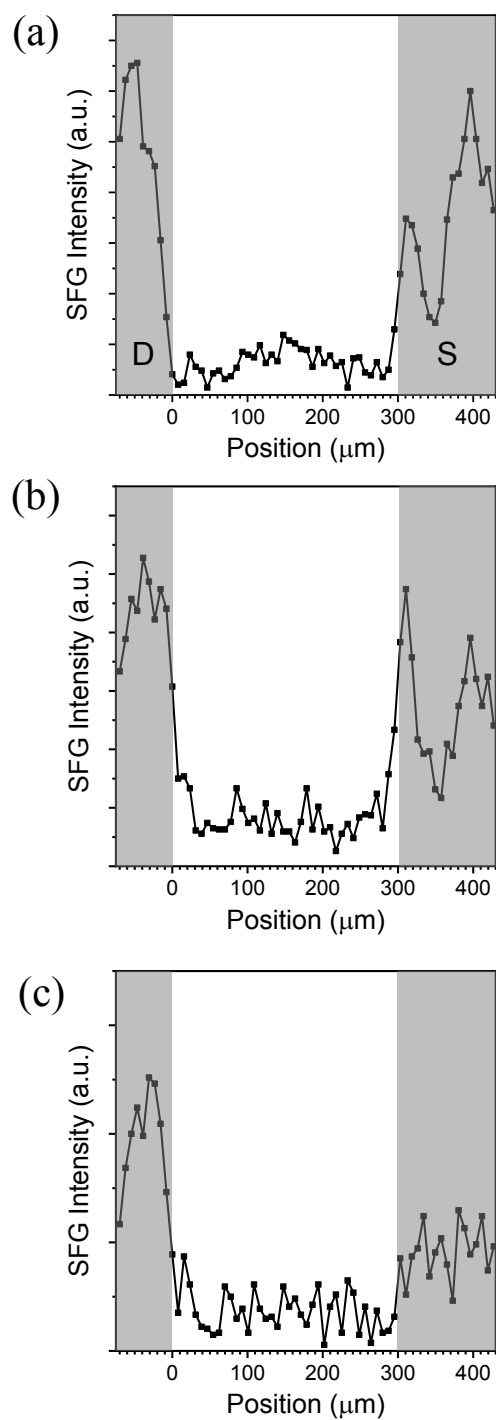

Figure S7. The intensity distribution of SSP SFG signal of phenyl CH stretching ( $3065\text{ cm}^{-1}$ ) across the semiconductor channel region for (a) the open circuit condition (after turn-on voltage), (b)  $V_{\text{gs}} = -3\text{ V}$  and (c)  $V_{\text{gs}} = V_{\text{ds}} = -3\text{ V}$ . The dark spot at the center of the source electrode shown in the SFG images is the scratch of the Au electrode.
